# Supplementary material for: Iron-sulfur clusters are involved in post-translational arginylation
Source: PubMed Central journal article supplement (PMC9884297; doi:10.1038/s41467-023-36158-z), 2023-01-28
Supplement: 41467_2023_36158_MOESM1_ESM.pdf [file 41467_2023_36158_MOESM1_ESM.pdf]

## Supplementary Information

### Iron-sulfur clusters are involved in post-translational arginylation

Verna Van<sup>1</sup>, Janae B. Brown<sup>1</sup>, Corin O'Shea<sup>2</sup>, Hannah Rosenbach<sup>3</sup>, Ijaz Mohamed<sup>1</sup>, Nna-Emeka Ejimogu<sup>1</sup>, Toan S. Bui<sup>1</sup>, Veronika A. Szalai<sup>4</sup>, Kelly N. Chacón<sup>5</sup>, Ingrid Span<sup>3</sup>, Fangliang Zhang<sup>2,6</sup>, and Aaron T. Smith<sup>1\*</sup>

<sup>1</sup>Department of Chemistry and Biochemistry, University of Maryland, Baltimore County, Baltimore, Maryland, 21250 USA

<sup>2</sup>Department of Molecular and Cellular Pharmacology, University of Miami, Miller School of Medicine, Miami, Florida, 33136 USA

<sup>3</sup>Institut für Physikalische Biologie, Heinrich-Heine-Universität Düsseldorf, 40225 Düsseldorf, Germany

<sup>4</sup>Physical Measurement Laboratory, National Institute of Standards and Technology, Gaithersburg, Maryland, 20899 USA

<sup>5</sup>Department of Chemistry, Reed College, Portland, Oregon, 97202 USA

<sup>6</sup>Sylvester Comprehensive Cancer Center, University of Miami Miller School of Medicine, Miami, Florida, 33136 USA

\*To whom correspondence should be addressed. Tel: 410-455-1985; E-mail: [smitha@umbc.edu](mailto:smitha@umbc.edu)

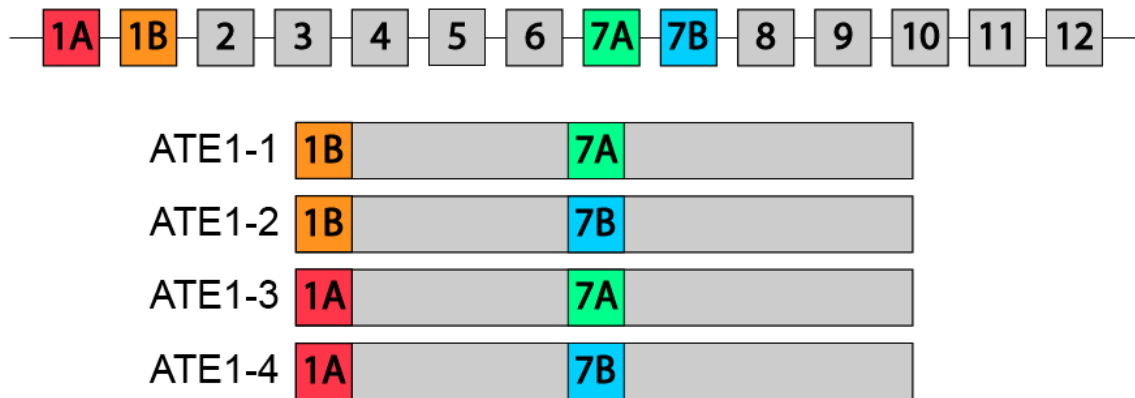

**Supplementary Figure 1.** The splicing-derived isoforms of *Mus musculus* (*Mm*) ATE1 resulting from alternative splicing of the *Mm ate1* gene. There are two splicing forms of intron 1 (1A,1B) and two splicing forms of intron 7 (7A,7B). The most-commonly studied isoform is that of *Mm*ATE1-1 (formerly known as isoform *Mm*ATE1<sup>1B7A</sup>).

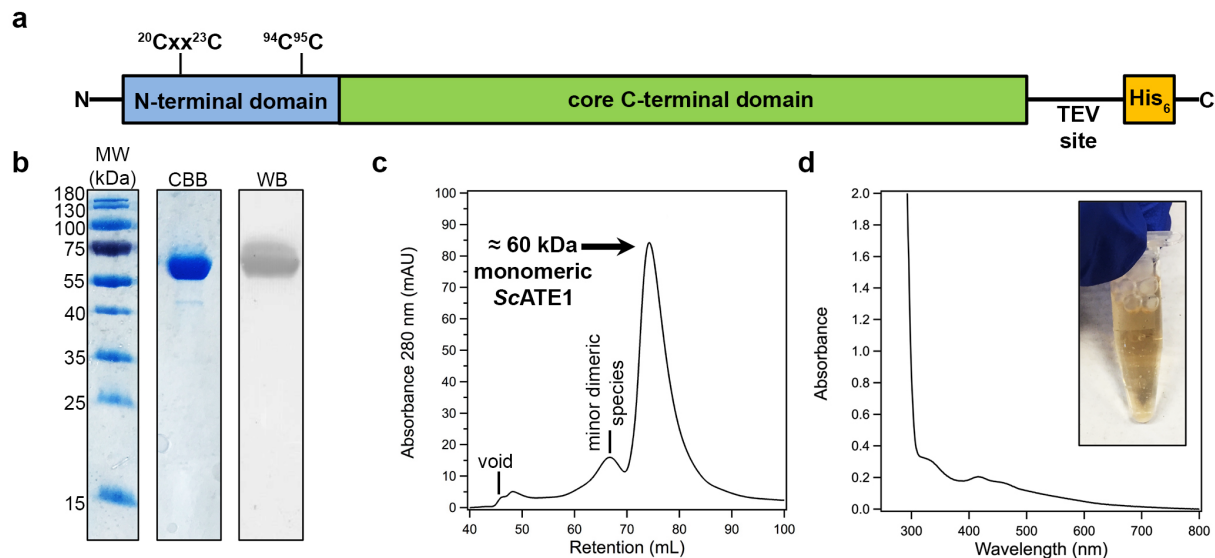

**Supplementary Figure 2.** Expression, purification, and preliminary characterization of *Saccharomyces cerevisiae* ATE1 (*ScATE1*). **a.** Schematic cartoon of the *ScATE1* construct, with the N-terminal domain (site of [Fe-S] cluster binding) in blue, the core C-terminal domain in green, and the C-terminal (His<sub>6</sub>) tag in yellow. The expression construct contains all amino acids encoded by the *ate1* gene of *Saccharomyces cerevisiae* (Uniprot identifier P16639). **b.** SDS-PAGE (acrylamide mass fraction of 15 %; CBB) analysis of *ScATE1* post metal-affinity and size-exclusions chromatographies and its respective Western blot (WB). *ScATE1* has an approximate molecular weight of 60000 g/mol (60 kDa;  $n = 3$  independent purifications). **c.** Size-exclusion chromatogram of purified *ScATE1*. The major oligomeric species appears to be monomeric based on molecular-weight standards. A minor dimeric species is seen at earlier retention volumes, although this species is variable and comprises < 5 % of our best protein preparations. 1 mAU = 1 absorbance unit/10<sup>-3</sup>. **d.** Concentrated *ScATE1* expressed in the presence of heme precursors  $\delta$ -aminolevulinic acid and ferric citrate and purified under oxic conditions displays a brown color (inset), characteristic of [Fe-S] clusters. The electronic absorption spectrum of this purified protein suggests that [Fe-S] clusters are present at low quantities under these expression and purification conditions after size-exclusion chromatography. Source data are provided as a Source Data file.

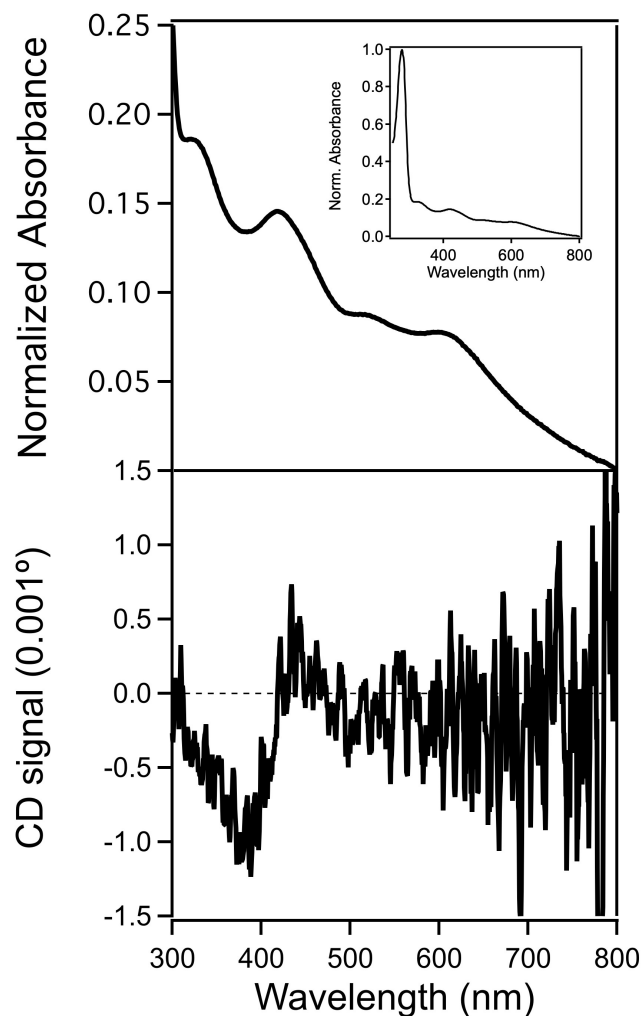

**Supplementary Figure 3.** The electronic absorption spectrum (top) and circular dichroism (CD) spectrum (bottom) of *ScATE1* expressed in the presence of *L*-Cys, ferric citrate, and iron-sulfur cluster (ISC) biosynthesis machinery, and subsequently purified under oxic conditions. Top, inset: the full electronic absorption spectrum.  $0.001^\circ = 1$  mdeg. Source data are provided as a Source Data file.



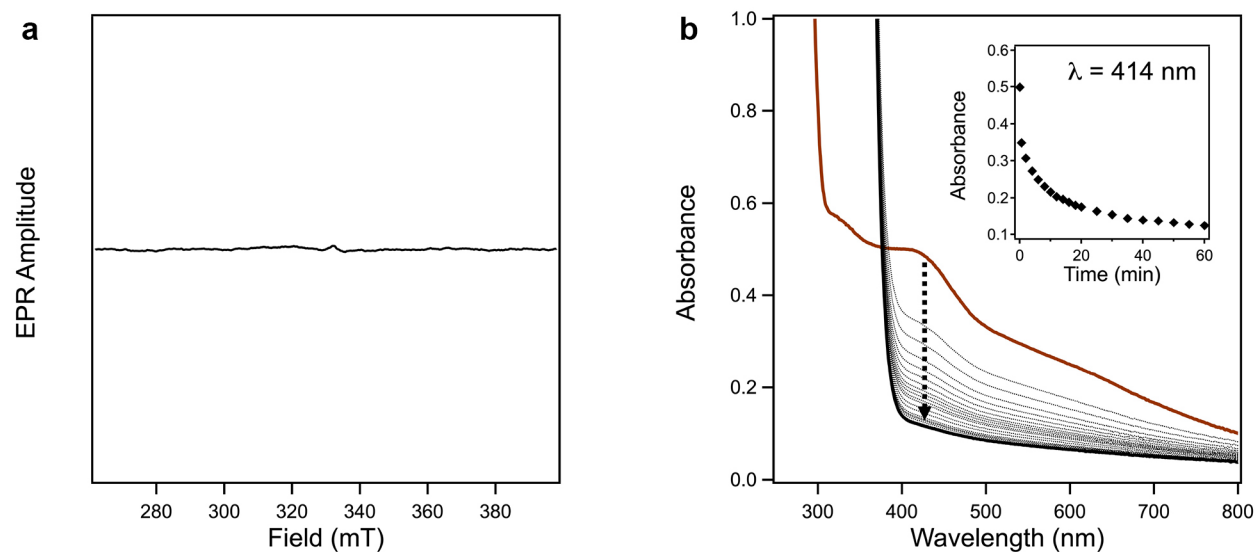

**Supplementary Figure 4.** Characterization and reactivity of the *ScATE1*  $[2\text{Fe-2S}]^{2+}$  cluster. **a.** The EPR spectrum of *ScATE1* displays no EPR signal after purification under oxic conditions, consistent with either an antiferromagnetically-coupled  $[2\text{Fe-2S}]^{2+}$  cluster (supported by other spectral assignments) or an antiferromagnetically-coupled  $[4\text{Fe-4S}]^{2+}$  cluster (not supported by other spectral assignments under oxic conditions). Spectral acquisition parameters were as follows: frequency = 9.38 GHz, temperature = 20 K, modulation amplitude = 0.5 mT, modulation frequency = 100 kHz, 1024 points, conversion time = 87.89 ms, microwave power = 9.5 mW, 16 scans. For comparison's sake, the spectrum is scaled to the same y-axis as EPR spectra in main text. **b.** Reaction of *ScATE1*  $[2\text{Fe-2S}]^{2+}$  with sodium dithionite under anoxic conditions results in a time-dependent bleaching (dotted) of the electronic absorption spectrum, from the starting spectrum (brown, solid) to the final spectrum (black, solid). Inset: time-dependent loss of the 414 nm feature of the electronic absorption spectrum of *ScATE1*  $[2\text{Fe-2S}]^{2+}$  after addition of sodium dithionite. Source data are provided as a Source Data file.

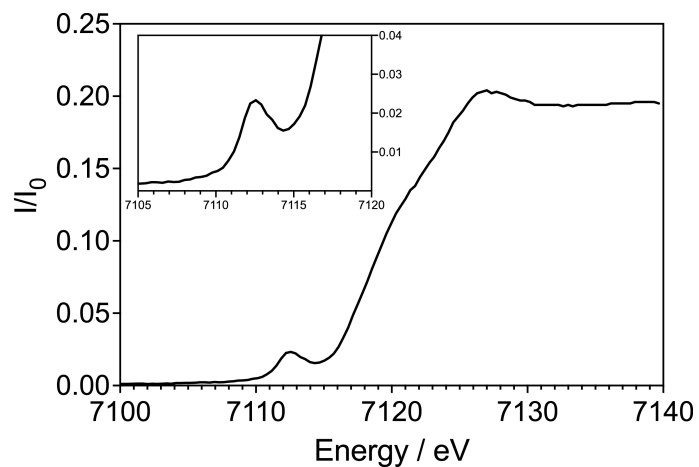

**Supplementary Figure 5.** The XANES spectrum of *ScATE1* reconstituted under anoxic conditions. Inset: expanded pre-edge feature of the  $1s \rightarrow 3d$  transition at 7112.5 eV, consistent with tetrahedral Fe sites. Source data are provided as a Source Data file.

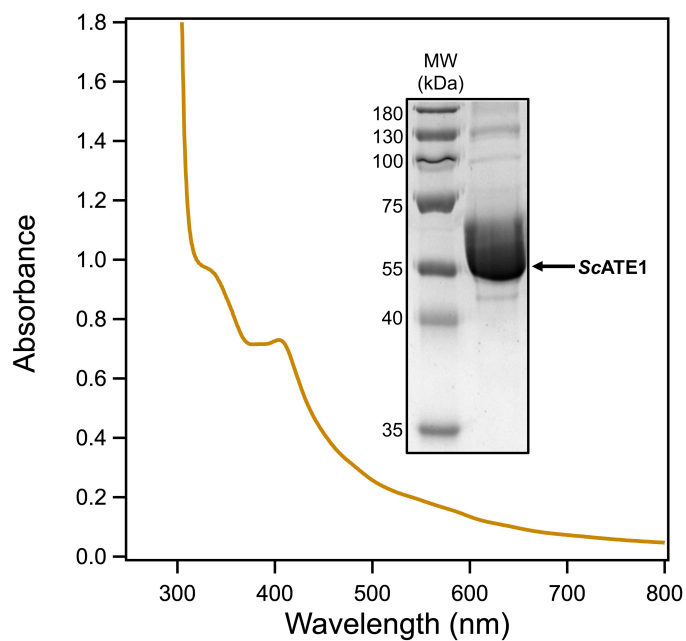

**Supplementary Figure 6.** *ScATE1* expressed in anaerobic *E. coli* and purified under anoxic conditions binds a higher-order cluster. The electronic absorption spectrum (orange) displays peak maxima indicative of a mixture of  $[4\text{Fe-4S}]^{2+}$  and  $[3\text{Fe-4S}]^+$  clusters. Inset: the SDS-PAGE analysis of *ScATE1* expressed in anaerobic *E. coli* and purified under anoxic conditions demonstrates good final purity, although the total protein yield is significantly diminished. Purified *ScATE1* has an approximate molecular weight of 60000 g/mol (60 kDa). Source data are provided as a Source Data file.

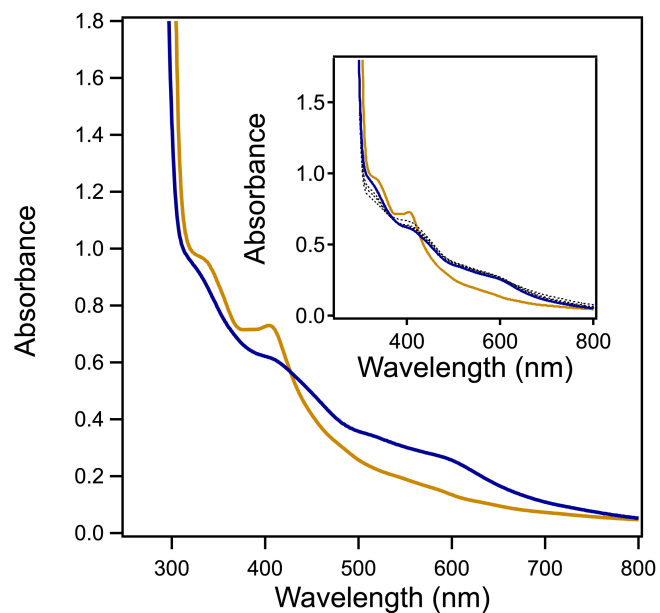

**Supplementary Figure 7.** *ScATE1* expressed in anaerobic *E. coli* and purified under anoxic conditions is oxygen sensitive. The electronic absorption spectrum of *ScATE1* purified anoxically before (orange) and after (blue) exposure to ambient atmosphere. Inset: time-dependent electronic absorption scans (dotted) of the oxidation of *ScATE1* purified anoxically. The majority of the protein (estimated > 90 %) is oxidized in < 5 min. Source data are provided as a Source Data file.

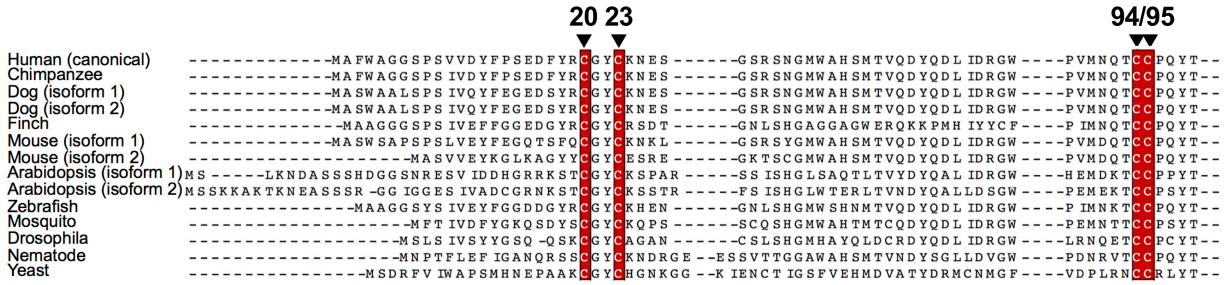

**Supplementary Figure 8.** Partial protein sequence alignments of the N-terminal domains of eukaryotic ATE1s. For brevity's sake, a small, curated set of exemplary ATE1s across the eukaryotic domain are shown: human (*Homo sapiens*; Uniprot ID: P16639), chimpanzee (*Pan troglodytes*; Uniprot ID: H2Q2P4), dog (*Canus familiaris*; isoform 1 Uniprot ID: J9P4X6; isoform 2 Uniprot ID: E2RS45), finch (*Poephila guttata*; Uniprot ID: H0ZM06), mouse (*Mus musculus*; isoform 1 Uniprot ID: Q80YP1; isoform 2 Uniprot ID: Q4FCQ6), arabidopsis (*Arabidopsis thaliana*; isoform 1 Uniprot ID: Q9ZT48; isoform 2 Uniprot ID: Q9C776), zebrafish (*Brachydanio rerio*; Uniprot ID: G8XPI0), mosquito (*Aedes aegypti*; Uniprot ID: Q178G8), drosophila (*Drosophila melanogaster*; Uniprot ID: O96539), nematode (*Caenorhabditis elegans*; Uniprot ID: P90914), and yeast (*Saccharomyces cerevisiae*; Uniprot ID: P16639). The wholly-conserved Cys residues involved in cluster binding are highlighted in red; the numbering of the Cys residues at the top of the figure is based on the yeast (*ScATE1*) protein sequence.

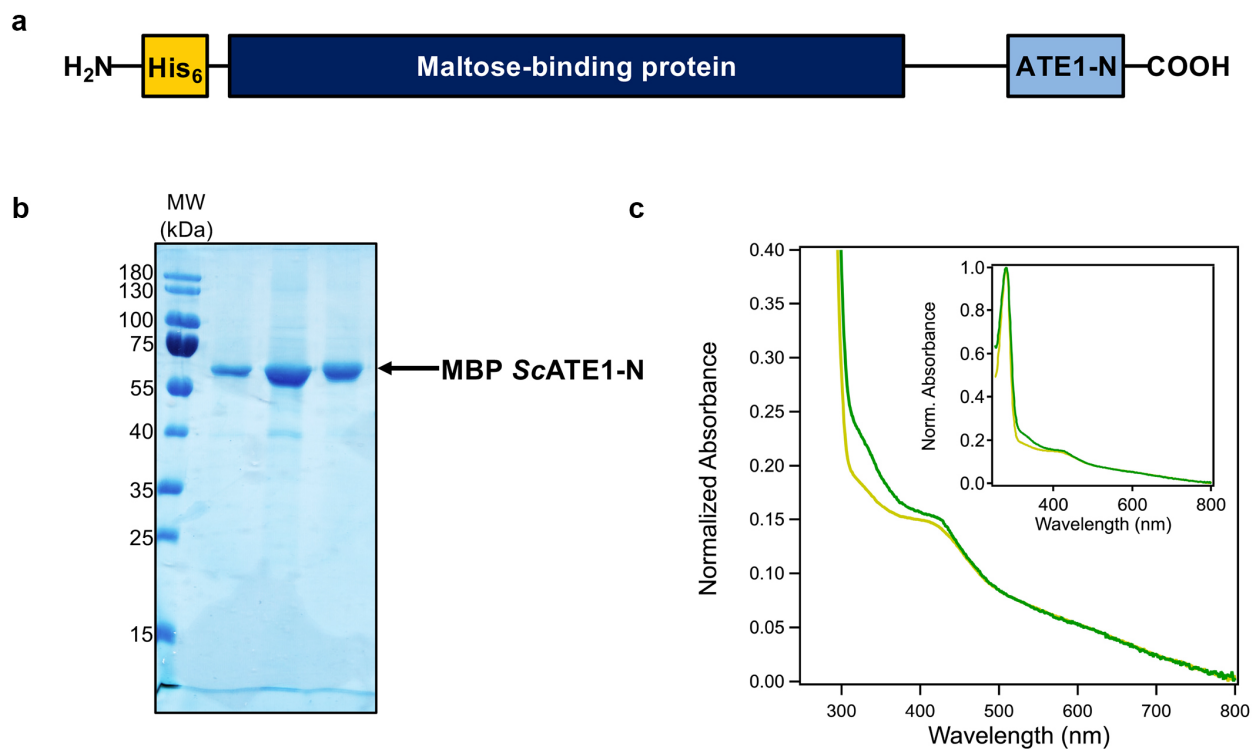

**Supplementary Figure 9.** Features of the MBP *ScATE1-N* construct. **a.** Schematic cartoon of the MBP *ScATE1-N* construct. The construct consists of an N-terminal (His)<sub>6</sub> tag (for orthogonal purification and Western blotting, yellow box), a maltose-binding protein segment for solubility (dark blue box), and the N-terminal 146 amino acids of *ScATE1* (light blue box). **b.** Representative SDS-PAGE (acrylamide mass fraction of 15 %) analysis of MBP *ScATE1-N* ( $n = 3$  independent purifications) post amylose column. MBP *ScATE1-N* has an approximate molecular weight of 61100 g/mol (61.1 kDa). **c.** Overlay of the electronic absorption spectrum of WT *ScATE1* reconstituted under anoxic conditions (yellow) and MBP *ScATE1-N* also reconstituted under anoxic conditions (green). Inset: the full spectra color-coded the same way. The spectra are almost identical, indicating that the reconstituted [4Fe-4S]<sup>2+</sup> cluster is bound in the *ScATE1* N-terminal domain. Source data are provided as a Source Data file.

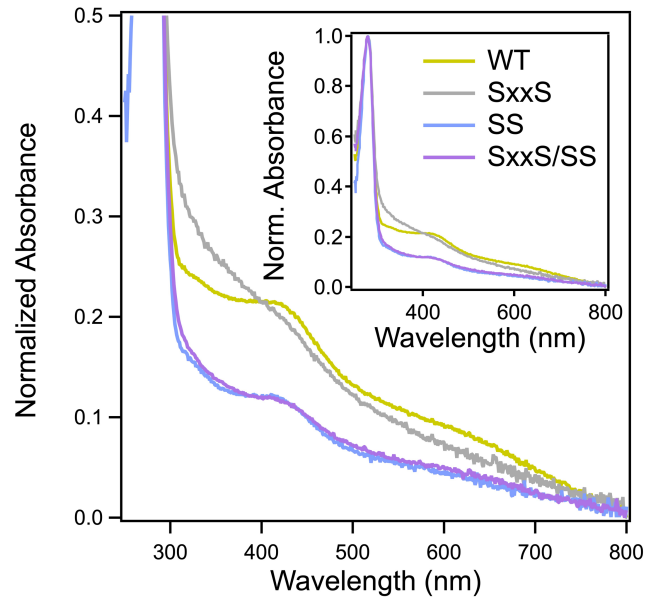

**Supplementary Figure 10.** Overlay of the electronic absorption spectra of WT *ScATE1* (yellow), variant  $S^{20}_{xx}S^{23}$  *ScATE1* (gray), variant  $S^{94}S^{95}$  *ScATE1* (blue), and variant  $S^{20}_{xx}S^{23}/S^{94}S^{95}$  *ScATE1* (purple) all reconstituted under anoxic conditions. All variants have distinct and/or diminished electronic absorption spectra compared to the WT protein. The largest impact in cluster binding appears to alteration of the  $C^{20}_{xx}C^{23}$  motif to  $S^{20}_{xx}S^{23}$ . Some adventitious iron binding is clear even in the quadruple variant, but the spectrum is still dramatically distinct from the WT protein. Source data are provided as a Source Data file.

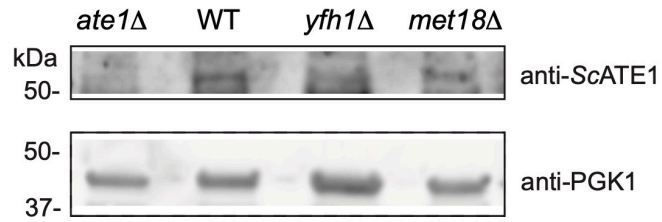

**Supplementary Figure 11.** Representative Western Blot images ( $n = 2$  replicates and verified in Ref. <sup>70</sup>) showing the levels of endogenous ATE1 in *Saccharomyces cerevisiae* *yfh1Δ* and *met18Δ*, in comparison to the wild-type and *ate1Δ* yeasts, which serve as positive and negative control, respectively. The level of PGK1 was used for a loading control. Source data are provided as a Source Data file.



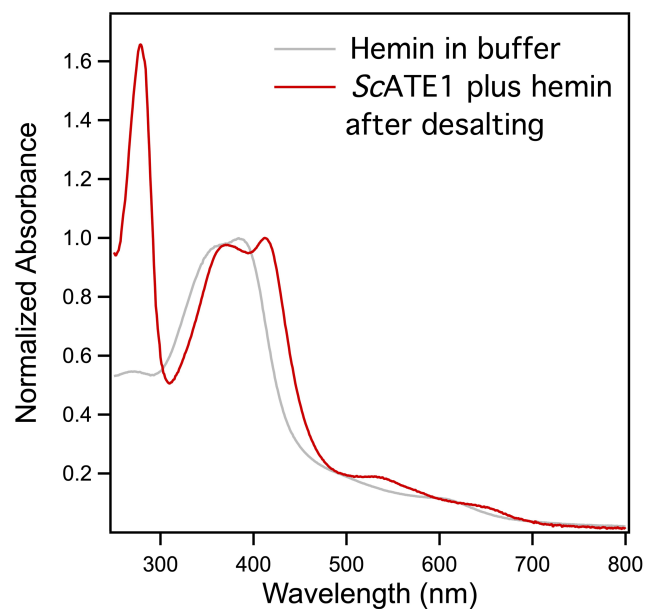

**Supplementary Figure 12.** *ScATE1* with titrated hemin has an electronic absorption spectrum consistent with non-specific heme binding. The electronic absorption spectrum of heme added to *ScATE1* is shown (red) after a desalting column to remove any unbound heme. For reference, hemin dissolved in *ScATE1* size-exclusion buffer (see *Methods* section) is shown in gray. Source data are provided as a Source Data file.

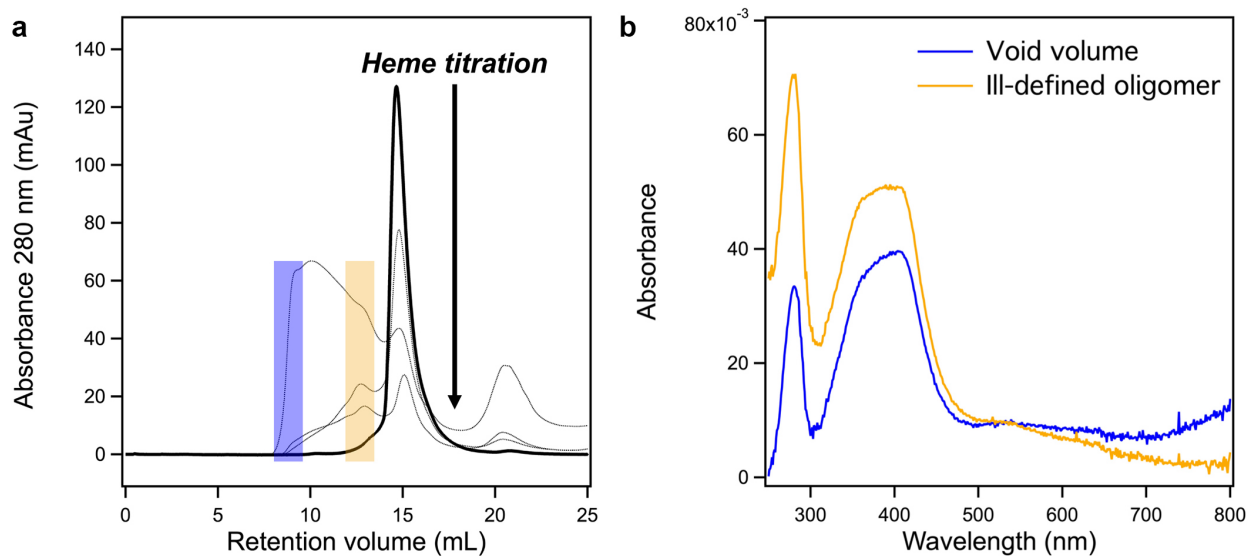

**Supplementary Figure 13.** Titration of heme into *ScATE1* causes protein aggregation. **a.** In the apo form, *ScATE1* is monodisperse and monomeric in solution (black solid trace) based on its retention volume (*ca.* 15 mL) compared to external standards. As heme is titrated into the protein (1, 2, 3, and 5 mole equivalents; gray dotted traces), the monodisperse and monomeric species is lost, resulting in an inactive ill-defined oligomer (*ca.* 12 mL retention volume) and inactive aggregate (*ca.* 9 mL retention volume; *i.e.*, the void volume of the column). 1 mAU = absorbance unit/ $10^{-3}$ . **b.** After titration and size-exclusion chromatography, the only species that have appreciable heme bound to them are those of the inactive ill-defined oligomer (electronic absorption spectrum in orange) and the inactive aggregated species (electronic absorption spectrum in blue). Highlighted on panel **a.** are the fractions that were collected to generate the electronic absorption spectra in panel **b.** Source data are provided as a Source Data file.

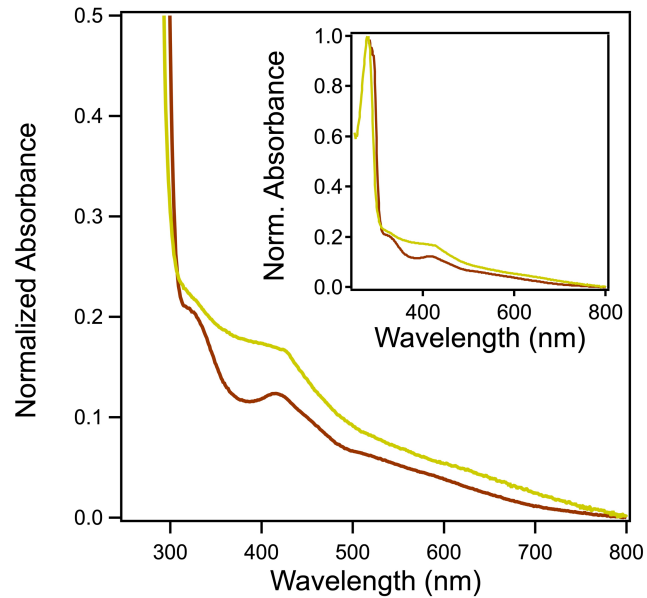

**Supplementary Figure 14.** Mouse ATE1 (*MmATE1-1*) is also an [Fe-S] cluster-binding protein. Expression of *MmATE1-1* in the presence of ferric citrate and *L*-Cys and subsequent purification under oxic conditions yields an electronic absorption spectrum (brown trace) indicative of a [2Fe-2S] cluster, nearly identical to *ScATE1*. Apo purified *MmATE1-1* reconstituted under anoxic conditions yields an electronic absorption spectrum (yellow trace) indicative of a [4Fe-4S] cluster, nearly identical to *ScATE1* and MBP *ScATE1-N*. Inset: the full spectra color-coded the same way as the main figure. Source data are provided as a Source Data file.

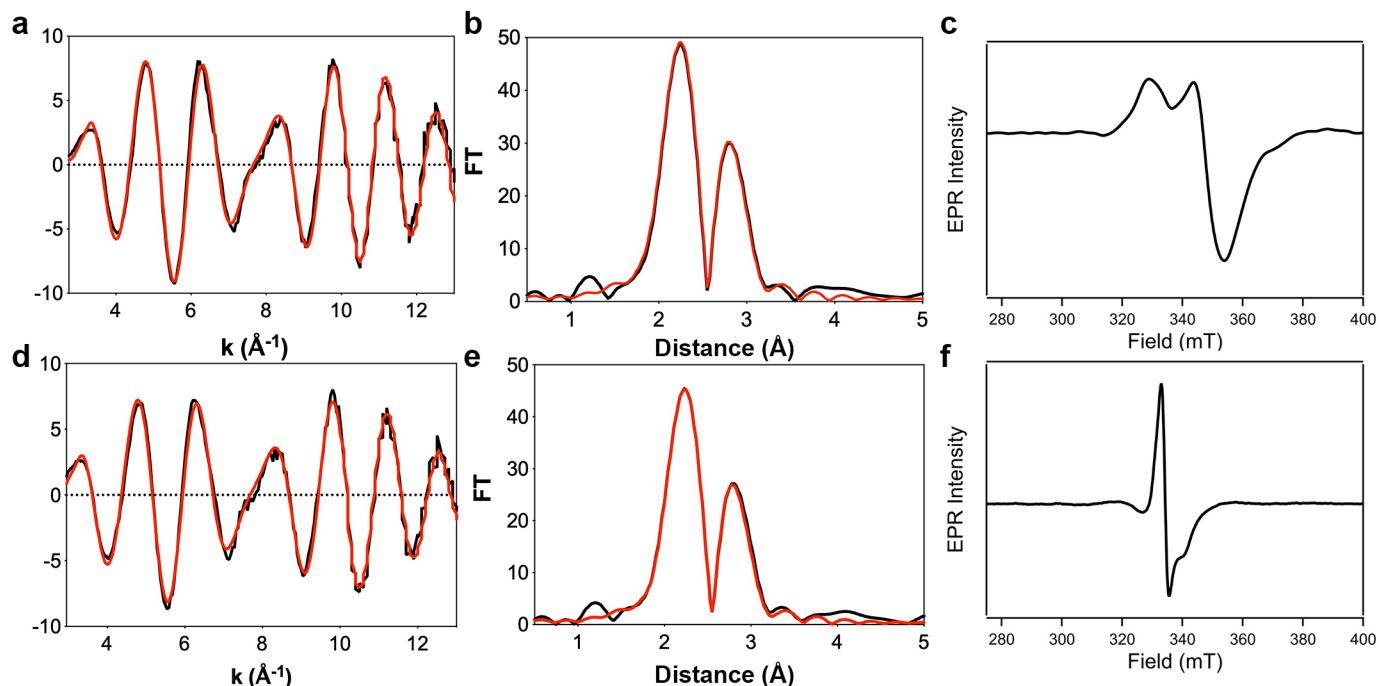

**Supplementary Figure 15.** *MmATE1-1* is also an O<sub>2</sub>-sensitive [Fe-S] cluster-binding protein. **a,b.** EXAFS of *MmATE1-1* reconstituted under anoxic conditions. The raw EXAFS (**a**) and the Fourier transformed data (**b**) are consistent with the presence of a [4Fe-4S] cluster. The black traces represent the experimental data while the red traces represent the EXCURVE-fitted data. 1 Å = 0.1 nm. **c.** A [4Fe-4S]<sup>+</sup> cluster is clearly observed in the dithionite-reduced EPR spectrum (black) of anoxically-reconstituted *MmATE1-1*. Conditions were similar to those in Figure 3 with the following exceptions: temperature = 10 K and 128 scans. **d,e.** EXAFS of *MmATE1-1* reconstituted under anoxic conditions after exposure to O<sub>2</sub>. The raw EXAFS (**d**) and the Fourier transformed data (**e**) are most consistent with a mixture of a [3Fe-4S] cluster and a [2Fe-2S] cluster. The black traces represent the experimental data while the red traces represent the EXCURVE-fitted data. 1 Å = 0.1 nm. **f.** After anoxic reconstitution of *MmATE1-1*, reaction with O<sub>2</sub>, and desalting, a [3Fe-4S]<sup>+</sup> cluster is readily apparent. Conditions were similar to those in Figure 3 with the following exceptions: temperature = 20 K, microwave power = 5 mW, and 16 scans. Source data are provided as a Source Data file.

**Supplementary Table 1.** Fits obtained for the Fe K-EXAFS *MmATE1* reconstituted anoxically and containing a [4Fe-4S] cluster, and *MmATE1* reconstituted anoxically and exposed to O<sub>2</sub>, in which the cluster converts to a mixed [3Fe-4S] and [2Fe-2S] species. Fits were determined by curve fitting using the program EXCURVE (version 9.2).

| Sample                                                                     | Fit index <sup>a</sup> | Fe-S            |                                 |                                   | Fe-Fe |       |                      | Fe-Fe |       |                      | E <sub>0</sub> <sup>e</sup> (eV) |
|----------------------------------------------------------------------------|------------------------|-----------------|---------------------------------|-----------------------------------|-------|-------|----------------------|-------|-------|----------------------|----------------------------------|
|                                                                            |                        | No <sup>b</sup> | R <sup>c</sup> (Å) <sup>f</sup> | DW <sup>d</sup> (Å <sup>2</sup> ) | No    | R (Å) | DW (Å <sup>2</sup> ) | No    | R (Å) | DW (Å <sup>2</sup> ) |                                  |
| <b><i>MmATE1</i> reconstituted anoxically</b>                              | 0.14                   | 4               | 2.26                            | 0.011                             | 2     | 2.71  | 0.004                | 1     | 2.53  | 0.011                | -2.18                            |
| <b><i>MmATE1</i> reconstituted anoxically and exposed to O<sub>2</sub></b> | 0.13                   | 3.5             | 2.25                            | 0.009                             | 1.5   | 2.71  | 0.003                | 0.5   | 2.55  | 0.005                | -2.79                            |

<sup>a</sup>The least-squares fitting parameter (see *Methods*) <sup>b</sup>Coordination number <sup>c</sup>Bond length <sup>d</sup>Debye-Waller factor <sup>e</sup>Photoelectron energy threshold <sup>f</sup>1 Å = 0.1 nm
